# Supplementary material for: Wealth and Relational Inequality: How Household Assets Shape Marital Stability by Family Type in Japan
Source: Research Square preprint supplement (doi:10.21203/rs.3.rs-8004673/v1), 2025-12-11
Supplement: Supplementary file 1 [file 3bd3b1917d0d57945916397d.docx]

**Table A1**. Effects of Individual Asset Components on Divorce Risk by Family Type

|  | Model 9 | Model 10 | Model 11 | Model 12 | Model 13 | Model 14 | Model 15 | Model 16 |
| --- | --- | --- | --- | --- | --- | --- | --- | --- |
| **Household Financial Assets (IHS)** | -0.154*** | -0.220*** |  |  |  |  |  |  |
| **Family type: Male-breadwinner (ref.)** |  |  |  |  |  |  |  |  |
| Dual-earner | 0.834*** | 0.459 | 0.908*** | 0.758** | 1.118*** | 1.798* | 0.860*** | 1.077*** |
| Female-breadwinner | 2.459*** | 2.029*** | 2.600*** | 2.461*** | 2.635*** | 3.365** | 2.651*** | 2.806*** |
| Other | 0.572* | 0.287 | 0.767** | 0.700+ | 0.872* | 1.224 | 0.752** | 0.755* |
| **Financial Assets × Male-breadwinner (ref.)** |  |  |  |  |  |  |  |  |
| Financial Assets × Dual-earner |  | 0.083 |  |  |  |  |  |  |
| Financial Assets × Female-breadwinner |  | 0.103 |  |  |  |  |  |  |
| Financial AssetsOther × Other |  | 0.064 |  |  |  |  |  |  |
| **House Owner** |  |  | -0.730*** | -0.964** |  |  |  |  |
| **House Owner × Male-breadwinner (ref.)** |  |  |  |  |  |  |  |  |
| House Owner × Dual-earner |  |  |  | 0.318 |  |  |  |  |
| House Owner × Female-breadwinner |  |  |  | 0.318 |  |  |  |  |
| House Owner × Other |  |  |  | 0.170 |  |  |  |  |
| **Household Fixed Assets (IHS)** |  |  |  |  | -0.256*** | -0.179+ |  |  |
| **Mortgage Debt (IHS)** |  |  |  |  | 0.005 | 0.004 |  |  |
| **Fixed Assets × Male-breadwinner (ref.)** |  |  |  |  |  |  |  |  |
| Fixed Assets × Dual-earner |  |  |  |  |  | -0.096 |  |  |
| Fixed Assets × Female-breadwinner |  |  |  |  |  | -0.108 |  |  |
| Fixed Assets × Other |  |  |  |  |  | -0.047 |  |  |
| **Other Loans/Debt (IHS)** |  |  |  |  |  |  | 0.012 | 0.096+ |
| **Other Loans × Male-breadwinner (ref.)** |  |  |  |  |  |  |  |  |
| Other Loans × Dual-earner |  |  |  |  |  |  |  | -0.124+ |
| Other Loans × Female-breadwinner |  |  |  |  |  |  |  | -0.089 |
| Other Loans × Other |  |  |  |  |  |  |  | -0.011 |
| **Wife Edu: Below College (ref.)** |  |  |  |  |  |  |  |  |
| Wife Edu: College or above | -0.149 | -0.155 | -0.219 | -0.219 | 0.032 | 0.039 | -0.252 | -0.254 |
| **Husband Edu: Below College (ref.)** |  |  |  |  |  |  |  |  |
| Husband Edu: College or above | -0.169 | -0.161 | -0.278+ | -0.275+ | -0.259 | -0.261 | -0.295+ | -0.291+ |
| **Marriage Duration (ref.1-5years)** |  |  |  |  |  |  |  |  |
| Marriage Duration (6-10years) | -0.069 | -0.070 | -0.035 | -0.022 | -0.341 | -0.339 | -0.156 | -0.147 |
| Marriage Duration (11-15years) | 0.173 | 0.168 | 0.245 | 0.260 | -0.225 | -0.207 | 0.041 | 0.052 |
| Marriage Duration (over16years) | -0.241 | -0.264 | -0.098 | -0.087 | -0.580 | -0.565 | -0.398 | -0.389 |
| Age at Marriage | -0.068* | -0.069* | -0.077* | -0.078* | -0.059 | -0.058 | -0.092** | -0.092** |
| Number of Children | -0.073 | -0.068 | -0.022 | -0.020 | -0.053 | -0.064 | -0.018 | -0.020 |
| Living with Parents | 0.255 | 0.260 | 0.393 | 0.375 | 0.238 | 0.242 | 0.221 | 0.229 |
| Annual GDP Growth Rate (%) | 0.047 | 0.047 | 0.045 | 0.045 | 0.025 | 0.026 | 0.047 | 0.047 |
| Unemployment Rate (%) | 0.096 | 0.097 | 0.110 | 0.112 | 0.065 | 0.063 | 0.120 | 0.123 |
| **Residence Size: Major metropolitan(ref.)** |  |  |  |  |  |  |  |  |
| Other cities | 0.046 | 0.040 | 0.092 | 0.090 | -0.002 | -0.000 | 0.045 | 0.038 |
| Towns/Villages | -0.302 | -0.312 | -0.215 | -0.220 | -0.125 | -0.125 | -0.332 | -0.343 |
| **Birth Cohort: ≤1964 (ref.)** |  |  |  |  |  |  |  |  |
| 1965–1969 birth cohort | 0.660** | 0.665** | 0.722*** | 0.723*** | 0.818** | 0.832** | 0.725*** | 0.722*** |
| 1970–1974 birth cohort | 0.604* | 0.623* | 0.697** | 0.706** | 0.700* | 0.701* | 0.720** | 0.730** |
| 1975–1979 birth cohort | 0.854*** | 0.848*** | 1.011*** | 1.023*** | 1.004** | 1.018** | 1.021*** | 1.028*** |
| 1980–1989 birth cohort | 0.602* | 0.597* | 0.750** | 0.757** | 0.748* | 0.754* | 0.792** | 0.789** |
| Constant | -3.737*** | -3.435*** | -4.360*** | -4.249*** | -3.029* | -3.609* | -4.118*** | -4.279*** |
| *N* | 24298 | 24298 | 24298 | 24298 | 17500 | 17500 | 24298 | 24298 |
| Pseudo R-squared | 0.076 | 0.077 | 0.071 | 0.071 | 0.081 | 0.082 | 0.062 | 0.064 |

Robust standard errors clustered at individual level in parentheses

Reference categories: Male-breadwinner household, Below College education, ≤1964 birth cohort

+ p<0.10, * p<0.05, ** p<0.01, *** p<0.001

**Table A2**. Effects of Individual Asset Components on Divorce Risk by Wife's Income Share

|  | Model 17 | Model 18 | Model 19 | Model 20 | Model 21 | Model 22 | Model 23 | Model 24 |
| --- | --- | --- | --- | --- | --- | --- | --- | --- |
| **Household Financial Assets (IHS)** | -0.154*** | -0.162*** |  |  |  |  |  |  |
| **Wife's Income Share** | 2.695*** | 2.589*** | 2.816*** | 2.516*** | 2.784*** | 3.050** | 2.861*** | 2.653*** |
| **Financial Assets × Wife's Income Share** |  | 0.028 |  |  |  |  |  |  |
| **House Owner** |  |  | -0.720*** | -0.875*** |  |  |  |  |
| **House Owner × Wife's Income Share** |  |  |  | 0.607 |  |  |  |  |
| **Household Fixed Assets (IHS)** |  |  |  |  | -0.242*** | -0.228*** |  |  |
| **Mortgage Debt (IHS)** |  |  |  |  | 0.014 | 0.013 |  |  |
| **Fixed Assets × Wife's Income Share** |  |  |  |  |  | -0.043 |  |  |
| **Other Loans/Debt (IHS)** |  |  |  |  |  |  | 0.010 | -0.027 |
| **Other Loans × Wife's Income Share** |  |  |  |  |  |  |  | 0.131 |
| **Wife Edu: Below College (ref.)** |  |  |  |  |  |  |  |  |
| Wife Edu: College or above | -0.247 | -0.250 | -0.322+ | -0.334+ | -0.126 | -0.128 | -0.364* | -0.363* |
| **Husband Edu: Below College (ref.)** |  |  |  |  |  |  |  |  |
| Husband Edu: College or above | -0.134 | -0.131 | -0.248 | -0.239 | -0.194 | -0.192 | -0.261 | -0.267 |
| **Marriage Duration (ref.1-5years)** |  |  |  |  |  |  |  |  |
| Marriage Duration (6-10years) | 0.075 | 0.074 | 0.145 | 0.135 | -0.219 | -0.219 | -0.002 | 0.003 |
| Marriage Duration (11-15years) | 0.321 | 0.323 | 0.466 | 0.463 | -0.061 | -0.058 | 0.228 | 0.231 |
| Marriage Duration (over16years) | -0.157 | -0.159 | 0.059 | 0.056 | -0.405 | -0.403 | -0.265 | -0.265 |
| **Age at Marriage** | -0.075* | -0.075* | -0.084* | -0.085** | -0.065 | -0.065 | -0.098** | -0.100** |
| **Number of Children** | -0.027 | -0.027 | 0.017 | 0.021 | -0.026 | -0.032 | 0.026 | 0.024 |
| **Living with Parents** | 0.305 | 0.310 | 0.431 | 0.415 | 0.288 | 0.291 | 0.264 | 0.258 |
| **Annual GDP Growth Rate (%)** | 0.044 | 0.044 | 0.045 | 0.046 | 0.018 | 0.018 | 0.047 | 0.047 |
| **Unemployment Rate (%)** | 0.116 | 0.117 | 0.127 | 0.132+ | 0.089 | 0.086 | 0.139+ | 0.132+ |
| **Residence Size: Major metropolitan(ref.)** |  |  |  |  |  |  |  |  |
| Other cities | 0.029 | 0.028 | 0.063 | 0.063 | -0.009 | -0.015 | 0.015 | 0.018 |
| Towns/Villages | -0.357 | -0.358 | -0.288 | -0.284 | -0.130 | -0.134 | -0.401 | -0.403 |
| **Birth Cohort: ≤1964 (ref.)** |  |  |  |  |  |  |  |  |
| 1965–1969 birth cohort | 0.659** | 0.662** | 0.720*** | 0.735*** | 0.867** | 0.871** | 0.731*** | 0.727*** |
| 1970–1974 birth cohort | 0.579* | 0.587* | 0.686** | 0.712** | 0.750* | 0.752* | 0.714** | 0.716** |
| 1975–1979 birth cohort | 0.857*** | 0.857*** | 1.031*** | 1.052*** | 0.998** | 0.993** | 1.045*** | 1.042*** |
| 1980–1989 birth cohort | 0.579* | 0.579* | 0.747** | 0.771** | 0.844* | 0.853* | 0.793** | 0.790** |
| Constant | -3.766*** | -3.744*** | -4.381*** | -4.312*** | -3.087* | -3.157* | -4.161*** | -4.023*** |
| *N* | 24298 | 24298 | 24298 | 24298 | 17500 | 17500 | 24298 | 24298 |
| Pseudo R-squared | 0.082 | 0.082 | 0.076 | 0.077 | 0.085 | 0.085 | 0.067 | 0.068 |

Robust standard errors clustered at individual level in parentheses

Reference categories: Male-breadwinner household, Below College education, ≤1964 birth cohort

+ p<0.10, * p<0.05, ** p<0.01, *** p<0.001

**Table A3**. Robustness Check: Discrete-Time Logistic Regression Models with Refined Family Type Categories (Regular vs. Non-regular Employment)

|  | Model 1 | Model 2 | Model 3 | Model 4 |
| --- | --- | --- | --- | --- |
| Household Net Worth (IHS) | -0.033** | -0.050* |  |  |
|  | (0.011) | (0.022) |  |  |
| Family type: Male-breadwinner (ref.) |  |  |  |  |
|  |  |  |  |  |
| Dual-earner(H regular, W non-regular) | 0.705*** | 0.604** | 0.737*** | 0.221 |
|  | (0.205) | (0.218) | (0.208) | (0.372) |
| Dual-earner(H regular, W regular) | 1.008*** | 1.014*** | 1.128*** | 0.401 |
|  | (0.220) | (0.234) | (0.223) | (0.444) |
| Female-breadwinner | 2.632*** | 2.613*** | 2.378*** | 1.723** |
|  | (0.302) | (0.332) | (0.332) | (0.534) |
| Other | 0.881*** | 0.763** | 0.737** | 0.323 |
|  | (0.252) | (0.270) | (0.259) | (0.398) |
| Net Worth × Male-breadwinner (ref.) |  |  |  |  |
|  |  |  |  |  |
| Net Worth × Dual-earner(H regular, W non-regular) |  | 0.033 |  |  |
|  |  | (0.028) |  |  |
| Net Worth × Dual-earner(H regular, W regular) |  | -0.003 |  |  |
|  |  | (0.031) |  |  |
| Net Worth × Female-breadwinner |  | 0.006 |  |  |
|  |  | (0.044) |  |  |
| Net Worth × Other |  | 0.039 |  |  |
|  |  | (0.033) |  |  |
| Household Financial Assets (IHS) |  |  | -0.124*** | -0.211*** |
|  |  |  | (0.025) | (0.044) |
| Household Fixed Assets (IHS) |  |  | -0.113*** | -0.128** |
|  |  |  | (0.031) | (0.047) |
| Mortgage Debt (IHS) |  |  | 0.006 | 0.008 |
|  |  |  | (0.031) | (0.031) |
| Other Loans/Debt (IHS) |  |  | -0.020 | -0.019 |
|  |  |  | (0.028) | (0.028) |
| Financial Assets × Male-breadwinner (ref.) |  |  |  |  |
|  |  |  |  |  |
| Financial Assets × Dual-earner(H regular, W non-regular) |  |  |  | 0.111+ |
|  |  |  |  | (0.061) |
| Financial Assets × Dual-earner(H regular, W regular) |  |  |  | 0.129+ |
|  |  |  |  | (0.071) |
| Financial Assets × Female-breadwinner |  |  |  | 0.174+ |
|  |  |  |  | (0.095) |
| Financial AssetsOther × Other |  |  |  | 0.058 |
|  |  |  |  | (0.072) |
| Fixed Assets × Male-breadwinner (ref.) |  |  |  |  |
|  |  |  |  |  |
| Fixed Assets × Dual-earner(H regular, W non-regular) |  |  |  | 0.004 |
|  |  |  |  | (0.051) |
| Fixed Assets × Dual-earner(H regular, W regular) |  |  |  | 0.026 |
|  |  |  |  | (0.058) |
| Fixed Assets × Female-breadwinner |  |  |  | -0.021 |
|  |  |  |  | (0.086) |
| Fixed Assets × Other |  |  |  | 0.032 |
|  |  |  |  | (0.063) |
| Wife Edu: College or above | -0.252 | -0.251 | -0.155 | -0.162 |
|  | (0.172) | (0.171) | (0.173) | (0.173) |
| Husband Edu: College or above | -0.247 | -0.247 | -0.151 | -0.133 |
|  | (0.166) | (0.166) | (0.166) | (0.166) |
| Marriage Duration (ref.1-5years) |  |  |  |  |
|  |  |  |  |  |
| Marriage Duration (6-10years) | -0.141 | -0.147 | 0.083 | 0.079 |
|  | (0.273) | (0.272) | (0.273) | (0.275) |
| Marriage Duration (11-15years) | 0.059 | 0.052 | 0.416 | 0.410 |
|  | (0.281) | (0.280) | (0.290) | (0.293) |
| Marriage Duration (over16years) | -0.372 | -0.387 | 0.082 | 0.056 |
|  | (0.299) | (0.299) | (0.310) | (0.310) |
| Age at Marriage | -0.087** | -0.088** | -0.053 | -0.054+ |
|  | (0.033) | (0.034) | (0.032) | (0.032) |
| Number of Children | -0.042 | -0.039 | -0.073 | -0.069 |
|  | (0.099) | (0.099) | (0.098) | (0.098) |
| Living with Parents | 0.283 | 0.277 | 0.459 | 0.485+ |
|  | (0.288) | (0.287) | (0.289) | (0.289) |
| Annual GDP Growth Rate (%) | 0.046 | 0.047 | 0.045 | 0.045 |
|  | (0.033) | (0.033) | (0.033) | (0.033) |
| Unemployment Rate (%) | 0.113 | 0.110 | 0.090 | 0.095 |
|  | (0.080) | (0.080) | (0.081) | (0.081) |
| Residence Size: Major metropolitan(ref.) |  |  |  |  |
|  |  |  |  |  |
| Other cities | 0.034 | 0.036 | 0.081 | 0.074 |
|  | (0.166) | (0.166) | (0.170) | (0.171) |
| Towns/Villages | -0.302 | -0.302 | -0.190 | -0.197 |
|  | (0.270) | (0.271) | (0.277) | (0.278) |
| Birth Cohort: ≤1964 (ref.) |  |  |  |  |
|  |  |  |  |  |
| 1965–1969 birth cohort | 0.672** | 0.680** | 0.655** | 0.658** |
|  | (0.211) | (0.211) | (0.214) | (0.214) |
| 1970–1974 birth cohort | 0.623* | 0.625* | 0.565* | 0.599* |
|  | (0.246) | (0.246) | (0.252) | (0.249) |
| 1975–1979 birth cohort | 0.937*** | 0.938*** | 0.862*** | 0.858*** |
|  | (0.247) | (0.246) | (0.247) | (0.248) |
| 1980–1989 birth cohort | 0.665** | 0.668** | 0.561* | 0.558* |
|  | (0.255) | (0.254) | (0.260) | (0.261) |
| Constant | -4.004*** | -3.914*** | -4.146*** | -3.718*** |
|  | (0.968) | (0.977) | (0.973) | (1.001) |
| *N* | 24298 | 24298 | 24298 | 24298 |
| Pseudo R-squared | 0.066 | 0.067 | 0.091 | 0.093 |

Robust standard errors clustered at individual level in parentheses

Reference categories: Male-breadwinner household, Below College education, ≤1964 birth cohort

+ p<0.10, * p<0.05, ** p<0.01, *** p<0.001

**Table A4.** Robustness Check: Discrete-Time Logistic Regression Models with Asset Quartiles

|  | Model 1 | Model 2 | Model 3 | Model 4 |
| --- | --- | --- | --- | --- |
| Household Net Worth (Q1) |  |  |  |  |
|  |  |  |  |  |
| Household Net Worth (Q2) | -0.470** | -0.600+ |  |  |
|  | (0.180) | (0.354) |  |  |
| Household Net Worth (Q3) | -0.951*** | -1.163* |  |  |
|  | (0.223) | (0.505) |  |  |
| Household Net Worth (Q4) | -0.593** | -0.917+ |  |  |
|  | (0.229) | (0.519) |  |  |
| Family type: Male-breadwinner (ref.) |  |  |  |  |
|  |  |  |  |  |
| Dual-earner | 0.832*** | 0.664* | 0.888*** | 0.477 |
|  | (0.187) | (0.265) | (0.192) | (0.294) |
| Female-breadwinner | 2.574*** | 2.460*** | 2.430*** | 2.015*** |
|  | (0.306) | (0.432) | (0.325) | (0.471) |
| Other | 0.714* | 0.726+ | 0.627* | 0.443 |
|  | (0.286) | (0.379) | (0.292) | (0.409) |
| Net Worth(Q2) × Male-breadwinner (ref.) |  |  |  |  |
|  |  |  |  |  |
| Net Worth(Q2) × Dual-earner |  | 0.222 |  |  |
|  |  | (0.423) |  |  |
| Net Worth(Q2) × Female-breadwinner |  | 0.461 |  |  |
|  |  | (0.713) |  |  |
| Net Worth(Q2) × Other |  | -0.587 |  |  |
|  |  | (0.845) |  |  |
| Net Worth(Q3) × Male-breadwinner (ref.) |  |  |  |  |
|  |  |  |  |  |
| Net Worth(Q3) × Dual-earner |  | 0.383 |  |  |
|  |  | (0.563) |  |  |
| Net Worth(Q3) × Female-breadwinner |  | 0.354 |  |  |
|  |  | (0.956) |  |  |
| Net Worth(Q3) × Other |  | -0.902 |  |  |
|  |  | (1.154) |  |  |
| Net Worth(Q4) × Male-breadwinner (ref.) |  |  |  |  |
|  |  |  |  |  |
| Net Worth(Q4) × Dual-earner |  | 0.417 |  |  |
|  |  | (0.566) |  |  |
| Net Worth(Q4) × Female-breadwinner |  | -0.153 |  |  |
|  |  | (0.962) |  |  |
| Net Worth(Q4) × Other |  | 0.677 |  |  |
|  |  | (0.735) |  |  |
| Household Financial Assets (Q1) |  |  |  |  |
|  |  |  |  |  |
| Household Financial Assets (Q2) |  |  | -0.331+ | -0.623+ |
|  |  |  | (0.172) | (0.347) |
| Household Financial Assets (Q3) |  |  | -0.880*** | -1.503** |
|  |  |  | (0.224) | (0.484) |
| Household Financial Assets (Q4) |  |  | -1.187*** | -2.793** |
|  |  |  | (0.281) | (1.031) |
| Household Fixed Assets (Q1) |  |  |  |  |
|  |  |  |  |  |
| Household Fixed Assets (Q2) |  |  | -1.074*** | -1.471* |
|  |  |  | (0.282) | (0.630) |
| Household Fixed Assets (Q3) |  |  | -1.168*** | -0.918+ |
|  |  |  | (0.312) | (0.491) |
| Household Fixed Assets (Q4) |  |  | -0.657* | -1.024+ |
|  |  |  | (0.297) | (0.552) |
| Mortgage Debt (Q1) |  |  |  |  |
|  |  |  |  |  |
| Mortgage Debt (Q3) |  |  | -0.004 | 0.011 |
|  |  |  | (0.292) | (0.295) |
| Mortgage Debt (Q4) |  |  | 0.072 | 0.066 |
|  |  |  | (0.288) | (0.293) |
| Other Loans/Debt (Q1) |  |  |  |  |
|  |  |  |  |  |
| Other Loans/Debt (Q3) |  |  | -0.135 | -0.147 |
|  |  |  | (0.434) | (0.427) |
| Other Loans/Debt (Q4) |  |  | -0.138 | -0.139 |
|  |  |  | (0.163) | (0.160) |
| Financial Assets(Q2) × Male-breadwinner (ref.) |  |  |  |  |
|  |  |  |  |  |
| Financial Assets(Q2) × Dual-earner |  |  |  | 0.461 |
|  |  |  |  | (0.405) |
| Financial Assets(Q2) × Female-breadwinner |  |  |  | 0.715 |
|  |  |  |  | (0.802) |
| Financial Assets(Q2) × Other |  |  |  | -1.211 |
|  |  |  |  | (1.100) |
| Financial Assets(Q3) × Male-breadwinner (ref.) |  |  |  |  |
|  |  |  |  |  |
| Financial Assets(Q3) × Dual-earner |  |  |  | 0.695 |
|  |  |  |  | (0.569) |
| Financial Assets(Q3) × Female-breadwinner |  |  |  | 1.240 |
|  |  |  |  | (1.018) |
| Financial Assets(Q3) × Other |  |  |  | 1.358+ |
|  |  |  |  | (0.767) |
| Financial Assets(Q4) × Male-breadwinner (ref.) |  |  |  |  |
|  |  |  |  |  |
| Financial Assets(Q4) × Dual-earner |  |  |  | 1.872+ |
|  |  |  |  | (1.074) |
| Financial Assets(Q4) × Female-breadwinner |  |  |  | 2.379+ |
|  |  |  |  | (1.334) |
| Financial Assets(Q4) × Other |  |  |  | 1.292 |
|  |  |  |  | (1.495) |
| Fixed Assets(Q2) × Male-breadwinner (ref.) |  |  |  |  |
|  |  |  |  |  |
| Fixed Assets(Q2) × Dual-earner |  |  |  | 0.493 |
|  |  |  |  | (0.665) |
| Fixed Assets(Q2) × Female-breadwinner |  |  |  | -0.477 |
|  |  |  |  | (1.196) |
| Fixed Assets(Q2) × Other |  |  |  | 0.295 |
|  |  |  |  | (0.903) |
| Fixed Assets(Q3) × Male-breadwinner (ref.) |  |  |  |  |
|  |  |  |  |  |
| Fixed Assets(Q3) × Dual-earner |  |  |  | -0.407 |
|  |  |  |  | (0.508) |
| Fixed Assets(Q3) × Female-breadwinner |  |  |  | 0.234 |
|  |  |  |  | (0.832) |
| Fixed Assets(Q3) × Other |  |  |  | -0.526 |
|  |  |  |  | (0.928) |
| Fixed Assets(Q4) × Male-breadwinner (ref.) |  |  |  |  |
|  |  |  |  |  |
| Fixed Assets(Q4) × Dual-earner |  |  |  | 0.478 |
|  |  |  |  | (0.560) |
| Fixed Assets(Q4) × Female-breadwinner |  |  |  | -0.743 |
|  |  |  |  | (1.356) |
| Fixed Assets(Q4) × Other |  |  |  | 0.393 |
|  |  |  |  | (0.788) |
| Wife Edu: College or above | -0.215 | -0.218 | -0.150 | -0.153 |
|  | (0.172) | (0.171) | (0.171) | (0.173) |
| Husband Edu: College or above | -0.222 | -0.225 | -0.146 | -0.131 |
|  | (0.171) | (0.171) | (0.167) | (0.168) |
| Marriage Duration (ref.1-5years) |  |  |  |  |
|  |  |  |  |  |
| Marriage Duration (6-10years) | -0.113 | -0.112 | 0.105 | 0.142 |
|  | (0.272) | (0.274) | (0.273) | (0.275) |
| Marriage Duration (11-15years) | 0.096 | 0.102 | 0.493+ | 0.532+ |
|  | (0.281) | (0.282) | (0.291) | (0.296) |
| Marriage Duration (over16years) | -0.294 | -0.299 | 0.282 | 0.297 |
|  | (0.301) | (0.301) | (0.314) | (0.318) |
| Age at Marriage | -0.078* | -0.076* | -0.047 | -0.046 |
|  | (0.033) | (0.034) | (0.033) | (0.033) |
| Number of Children | -0.049 | -0.045 | -0.073 | -0.074 |
|  | (0.100) | (0.099) | (0.100) | (0.101) |
| Living without Parents | 0.000 | 0.000 | 0.000 | 0.000 |
|  | (.) | (.) | (.) | (.) |
| Living with Parents | 0.296 | 0.301 | 0.440 | 0.442 |
|  | (0.287) | (0.287) | (0.288) | (0.291) |
| Annual GDP Growth Rate (%) | 0.045 | 0.046 | 0.044 | 0.046 |
|  | (0.033) | (0.033) | (0.034) | (0.033) |
| Unemployment Rate (%) | 0.100 | 0.095 | 0.081 | 0.094 |
|  | (0.080) | (0.080) | (0.081) | (0.081) |
| Residence Size: Major metropolitan(ref.) |  |  |  |  |
|  |  |  |  |  |
| Other cities | 0.065 | 0.064 | 0.157 | 0.165 |
|  | (0.167) | (0.167) | (0.170) | (0.173) |
| Towns/Villages | -0.248 | -0.254 | -0.067 | -0.082 |
|  | (0.267) | (0.268) | (0.273) | (0.276) |
| Birth Cohort: ≤1964 (ref.) |  |  |  |  |
|  |  |  |  |  |
| 1965–1969 birth cohort | 0.640** | 0.650** | 0.657** | 0.664** |
|  | (0.213) | (0.212) | (0.215) | (0.215) |
| 1970–1974 birth cohort | 0.585* | 0.611* | 0.564* | 0.591* |
|  | (0.248) | (0.246) | (0.249) | (0.250) |
| 1975–1979 birth cohort | 0.901*** | 0.922*** | 0.857*** | 0.861*** |
|  | (0.248) | (0.247) | (0.244) | (0.247) |
| 1980–1989 birth cohort | 0.603* | 0.616* | 0.547* | 0.550* |
|  | (0.260) | (0.260) | (0.259) | (0.262) |
| Constant | -3.953*** | -3.881*** | -4.565*** | -4.374*** |
|  | (0.967) | (0.991) | (0.970) | (0.998) |
| *N* | 24298 | 24298 | 24298 | 24298 |
| Pseudo R-squared | 0.071 | 0.073 | 0.096 | 0.103 |

Robust standard errors clustered at individual level in parentheses

Reference categories: Male-breadwinner household, Below College education, ≤1964 birth cohort

+ p<0.10, * p<0.05, ** p<0.01, *** p<0.001
